# Supplementary material for: Volatile Compounds in Fruit Peels as Novel Biomarkers for the Identification of Four Citrus Species
Source: PubMed Central journal article supplement (PMC6943597; doi:10.3390/molecules24244550), 2019-12-12
Supplement: molecules-24-04550-s001.pdf [file molecules-24-04550-s001.pdf]

Table S1 Materials and groups were used in this study.

| Citrus germplasms           | Species name                                        | Group | Wild or Cultivar |
|-----------------------------|-----------------------------------------------------|-------|------------------|
| Huanongbendizao tangerine   |                                                     | LSM   | Cultivar (C)     |
| Guinongbendizao tangerine   |                                                     | LSM   | C                |
| Guizhouwuhezhuju tangerine  |                                                     | LSM   | C                |
| Red Tangerine               |                                                     | LSM   | Wild (W)         |
| Huangyanbendizao tangerine  |                                                     | LSM   | C                |
| Nanfengmiju tangerine       |                                                     | LSM   | C                |
| Nianju tangerine            |                                                     | LSM   | C                |
| Nieduyedonggan              |                                                     | LSM   | W                |
| E-gan No.1 Ponkan tangerine |                                                     | LSM   | C                |
| Huapiju tangerine           |                                                     | LSM   | C                |
| Wuhe Ponkan tangerine       |                                                     | LSM   | C                |
| India sour Tangerine        | Loose-skin mandarin<br>( <i>Citrus reticulata</i> ) | LSM   | W                |
| Wulong Sour Tangerine       |                                                     | LSM   | W                |
| Cupigoushigan tangerine     |                                                     | LSM   | W                |
| Dakengyeju tangerine        |                                                     | LSM   | W                |
| Daoxianyeju tangerine       |                                                     | LSM   | W                |
| Jiangyongyeju tangerine     |                                                     | LSM   | W                |
| Mangshanju tangerine        |                                                     | LSM   | W                |
| Xipigoushigan tangerine     |                                                     | LSM   | W                |
| Damaliu tangerine           |                                                     | LSM   | W                |
| Yaoxianggan tangerine       |                                                     | LSM   | W                |
| Miyagawa Wase               |                                                     | LSM   | C                |
| Guangmingzao                |                                                     | LSM   | C                |
| Guoqing No.4                |                                                     | LSM   | C                |

|                          |                                                                   |     |   |
|--------------------------|-------------------------------------------------------------------|-----|---|
| Changyang Kamei          |                                                                   | LSM | C |
| Dapu                     |                                                                   | LSM | C |
| Inaba Wase               |                                                                   | LSM | C |
| Guoqing No.1             |                                                                   | LSM | C |
| Nichinan No.1 Wase       |                                                                   | LSM | C |
| Caffion clementine       |                                                                   | CCL | C |
| De nules clementine      |                                                                   | CCL | C |
| Hernadinal clementine    |                                                                   | CCL | C |
| Marisal clementine       |                                                                   | CCL | C |
| Monreal clementine       |                                                                   | CCL | C |
| Nour clementine          |                                                                   | CCL | C |
| Orograde clementine      |                                                                   | CCL | C |
| Oroval clementine        | Clementine mandarin ( <i>C. reticulata</i> × <i>C. sinensis</i> ) | CCL | C |
| Pons clementine          |                                                                   | CCL | C |
| Rrecoce clementine       |                                                                   | CCL | C |
| Rubino clementine        |                                                                   | CCL | C |
| Sidiaissa1 clementine    |                                                                   | CCL | C |
| Spinoso.V,C,R clementine |                                                                   | CCL | C |
| SRA63 clementine         |                                                                   | CCL | C |
| SRA92 clementine         |                                                                   | CCL | C |
| Tomatera clementine      |                                                                   | CCL | C |
| Anliucheng               |                                                                   | SW  | C |
| Qianyang Wuhe Dahong     |                                                                   | SW  | C |
| Hamlin Sweet Orange      | Sweet orange ( <i>C. sinensis</i> )                               | SW  | C |
| Red Anliucheng           |                                                                   | SW  | C |
| Meishan Wuhejincheng     |                                                                   | SW  | C |

---

|                         |    |   |
|-------------------------|----|---|
| Taoye sweet orange      | SW | C |
| Xuegan                  | SW | C |
| Qingpi                  | SW | C |
| Carter Valencia orange  | SW | C |
| Frost Valencia orange   | SW | C |
| Crame Navel Orange      | SW | C |
| Palmer Navel Orange     | SW | C |
| Red grand Navel Orange  | SW | C |
| Roberson Navel Orange   | SW | C |
| Smithearly Navel Orange | SW | C |
| Fukumoto Navel Orange   | SW | C |
| Red Flesh Navel Orange  | SW | C |
| Washington Naval Orange | SW | C |
| Dream Navel Orange      | SW | C |
| Nice navel Orange       | SW | C |
| Newhall Navel Orange    | SW | C |
| Seike Navel Orange      | SW | C |
| Xiatian Navel Orange    | SW | C |
| Zaohong Navel Orange    | SW | C |

---

|                       |                              |   |
|-----------------------|------------------------------|---|
| Huanonghongyou Pomelo | P                            | C |
| Taiyou Pomelo         | P                            | C |
| Acidless Pomelo       | P                            | C |
| Fenghuangyou Pomelo   | Pomelo ( <i>C. grandis</i> ) | C |
| Fenghuangyou Pomelo   | P                            | C |
| Juanpi Pomelo         | P                            | C |
| Ni 800 Pomelo         | P                            | W |

---

|                |                          |     |   |
|----------------|--------------------------|-----|---|
| Kuigan Pomelo  |                          | P   | W |
| Lime           |                          | Lem | W |
| Eureka Lemon   |                          | Lem | C |
| Volkamer lemon | Lemon ( <i>C.limon</i> ) | Lem | C |
| Limonia        |                          | Lem | W |
| Red Limonia    |                          | Lem | W |

Note LSM: loose-skin mandarin; CCL: clementine mandarin; SW: sweet orange; P: pomelo; Lem: lemon.

Table S2: Volatile compounds were used to PLS-DA in four citrus species.

| Abb. | compounds                          | ID | Abb. | compounds                                 | ID |
|------|------------------------------------|----|------|-------------------------------------------|----|
| C1   | $\alpha$ -pinene                   | S  | C46  | $\gamma$ -elemene                         | T  |
| C2   | sabinene                           | S  | C47  | <i>trans</i> - $\alpha$ -bergamotene      | T  |
| C3   | $\beta$ -pinene                    | S  | C48  | $\alpha$ -guaiene                         | T  |
| C4   | $\beta$ -myrcene                   | S  | C49  | germacrene D                              | T  |
| C5   | $\alpha$ -phellandrene             | S  | C50  | elixene                                   | T  |
| C6   | $\alpha$ -terpinene                | S  | C51  | $\alpha$ -selinene                        | T  |
| C7   | d-limonene                         | S  | C52  | $\alpha$ -muurolene                       | T  |
| C8   | $\beta$ -cis-ocimene               | S  | C53  | $\delta$ -guaiene                         | T  |
| C9   | <i>trans</i> - $\beta$ -ocimene    | S  | C54  | $\beta$ -bisabolene                       | T  |
| C10  | $\gamma$ -terpinene                | S  | C55  | $\delta$ -cadinene                        | T  |
| C11  | terpinolene                        | S  | C56  | germacrene B                              | T  |
| C12  | $\alpha$ -thujene                  | T  | C57  | <i>trans</i> -nerolidol                   | S  |
| C13  | camphene                           | T  | C58  | elemol                                    | T  |
| C14  | pseudolimonen                      | T  | C59  | germacrene D-4-ol                         | T  |
| C15  | <i>cis</i> -sabinene hydrate       | S  | C60  | $\beta$ -selinenol                        | T  |
| C16  | $\beta$ -linalool                  | S  | C61  | caryophyllene oxide                       | S  |
| C17  | terpinen-4-ol                      | S  | C62  | 2,6,10-trimethyl-2,6,9,11-dodecatetraenal | T  |
| C18  | $\alpha$ -terpineol                | S  | C63  | $\alpha$ -sinensal                        | T  |
| C19  | nerol                              | S  | C64  | 1-octanol                                 | T  |
| C20  | $\beta$ -citronellol               | S  | C65  | hexanal                                   | T  |
| C21  | <i>cis</i> -p-mentha-2,8-dien-1-ol | T  | C66  | (E)-2-hexenal                             | T  |
| C22  | citronellal                        | S  | C67  | octanal                                   | T  |
| C23  | $\beta$ -citral                    | S  | C68  | nonanal                                   | S  |
| C24  | (E)- $\alpha$ -citral              | S  | C69  | decanal                                   | S  |

|     |                                    |   |     |                          |   |
|-----|------------------------------------|---|-----|--------------------------|---|
| C25 | perillal                           | T | C70 | (Z)-2-decenal            | S |
| C26 | d-camphor                          | S | C71 | undecanal                | S |
| C27 | (+)-carvon                         | S | C72 | dodecanal                | S |
| C28 | (+)-p-mentha-1,8-dien-3-one        | T | C73 | 3-hexenal                | T |
| C29 | <i>cis</i> -limonene oxide         | S | C74 | n-hexadecanoic acid      | T |
| C30 | <i>trans</i> -limonene oxide       | S | C75 | methyl palmitate         | S |
| C31 | citronellyl acetate                | S | C76 | butyl acetate            | T |
| C32 | nerol acetate                      | S | C77 | acetic acid, octyl ester | T |
| C33 | geranyl acetate                    | S | C78 | octyl butanoate          | T |
| C34 | perillyl acetate                   | T | C79 | methyl linoleate         | T |
| C35 | caryophyllene                      | S | C80 | methyl oleate            | T |
| C36 | (Z)- $\beta$ -farnesene            | S | C81 | methyl stearate          | T |
| C37 | $\alpha$ -caryophyllene            | S | C82 | undecane                 | T |
| C38 | valencene                          | S | C83 | dodecane                 | T |
| C39 | $\alpha$ -farnesene                | S | C84 | tetradecane              | T |
| C40 | $\delta$ -elemene                  | T | C85 | p-cymene                 | T |
| C41 | $\alpha$ -cubebene                 | T | C86 | thymol                   | T |
| C42 | copaene                            | T | C87 | methyl thymyl ether      | T |
| C43 | $\beta$ -cubebene                  | T | C88 | nootkatone               | T |
| C44 | $\beta$ -elemene                   | T | C89 | limettin                 | T |
| C45 | <i>cis</i> - $\alpha$ -bergamotene | T |     |                          |   |

---

Note T: tentatively identified compounds; S: compounds identified based on authentic standards.

Table S3: The potential biomarkers were selected in Clementine mandarin and Wild citrus germplasm.

| Clementine mandarin   |                                           |           |
|-----------------------|-------------------------------------------|-----------|
| Abb.                  | Compounds                                 | VIP value |
| CM1                   | (Z)- $\beta$ -farnesene                   | 2.13      |
| CM2                   | dodecanal                                 | 2.08      |
| CM3                   | decanal                                   | 2.01      |
| CM4                   | $\alpha$ -terpineol acetate               | 1.89      |
| CM5                   | $\alpha$ -muurolene                       | 1.83      |
| CM6                   | nerol acetate                             | 1.77      |
| CM7                   | ylangene                                  | 1.76      |
| CM8                   | $\alpha$ -sinensal                        | 1.75      |
| CM9                   | <i>cis</i> -p-mentha-2,8-dien-1-ol        | 1.63      |
| CM10                  | $\gamma$ -terpinene                       | 1.63      |
| CM11                  | 2,6,10-trimethyl-2,6,9,11-dodecatetraenal | 1.6       |
| CM12                  | citronellal                               | 1.56      |
| CM13                  | sabinene                                  | 1.53      |
| CM14                  | allo-ocimene                              | 1.5       |
| Wild citrus germplasm |                                           |           |
| Abb.                  | Compounds                                 | VIP value |
| WM1                   | germacrene D                              | 2.26      |
| WM2                   | <i>trans</i> -nerolidol                   | 2.12      |
| WM3                   | germacrene B                              | 2.08      |
| WM4                   | $\gamma$ -elemene                         | 1.97      |
| WM5                   | $\beta$ -selinenol                        | 1.94      |
| WM6                   | (+)-p-mentha-1,8-dien-3-one               | 1.93      |
| WM7                   | citronellyl acetate                       | 1.81      |

|      |                                 |      |
|------|---------------------------------|------|
| WM8  | d-camphor                       | 1.8  |
| WM9  | $\beta$ -linalool               | 1.8  |
| WM10 | citronellal                     | 1.76 |
| WM11 | <i>trans</i> - $\beta$ -ocimene | 1.71 |
| WM12 | $\alpha$ -pinene                | 1.7  |
| WM13 | $\delta$ -elemene               | 1.69 |
| WM14 | $\beta$ -citronellol            | 1.67 |
| WM15 | $\alpha$ -thujene               | 1.63 |
| WM16 | germacrene D-4-ol               | 1.62 |
| WM17 | 3-hexenal                       | 1.62 |
| WM18 | elemol                          | 1.57 |
| WM19 | $\alpha$ -terpinene             | 1.54 |
| WM20 | $\gamma$ -terpinene             | 1.53 |

---



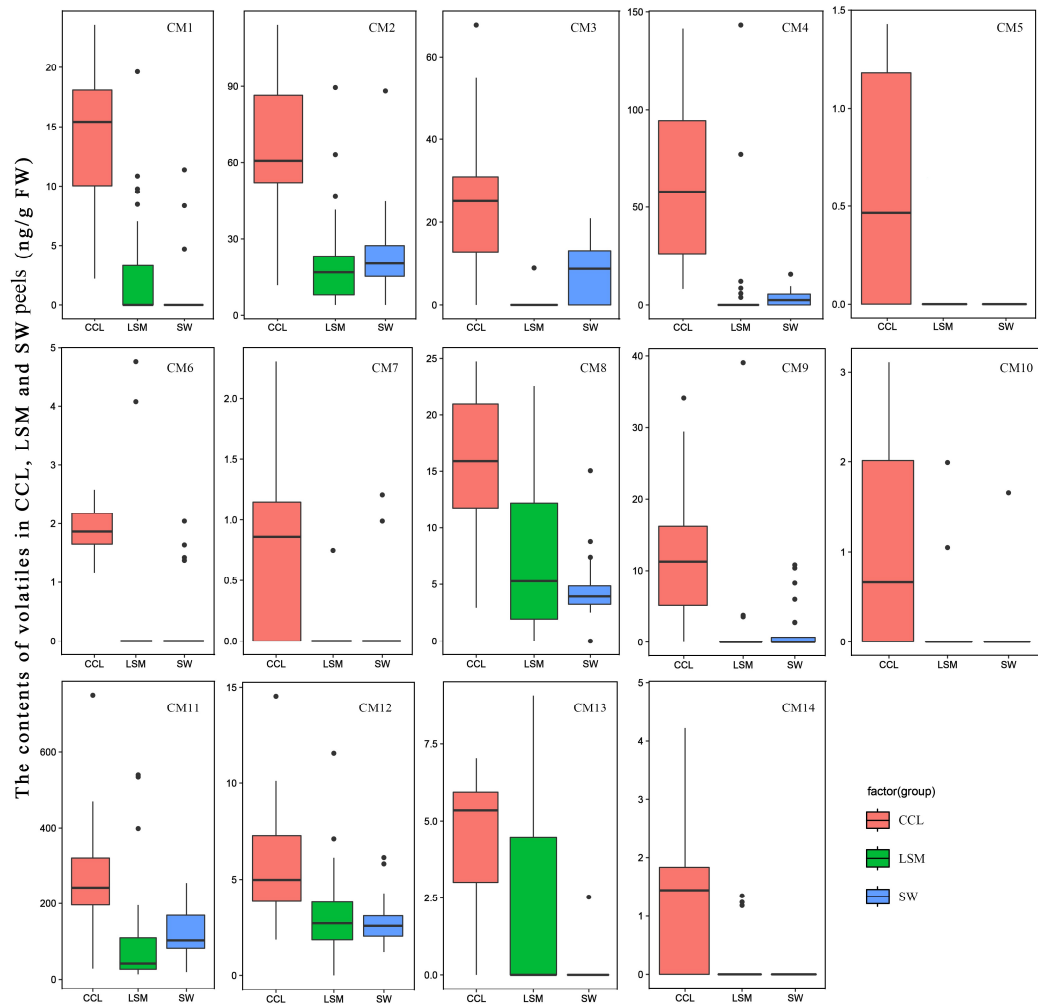

Figure 1. The contents of volatiles in CCL, LSM and SW peels. CCL: clementine mandarin; LSM: loose-skin mandarin; SW: sweet orange. The compounds were listed in the Table S3.

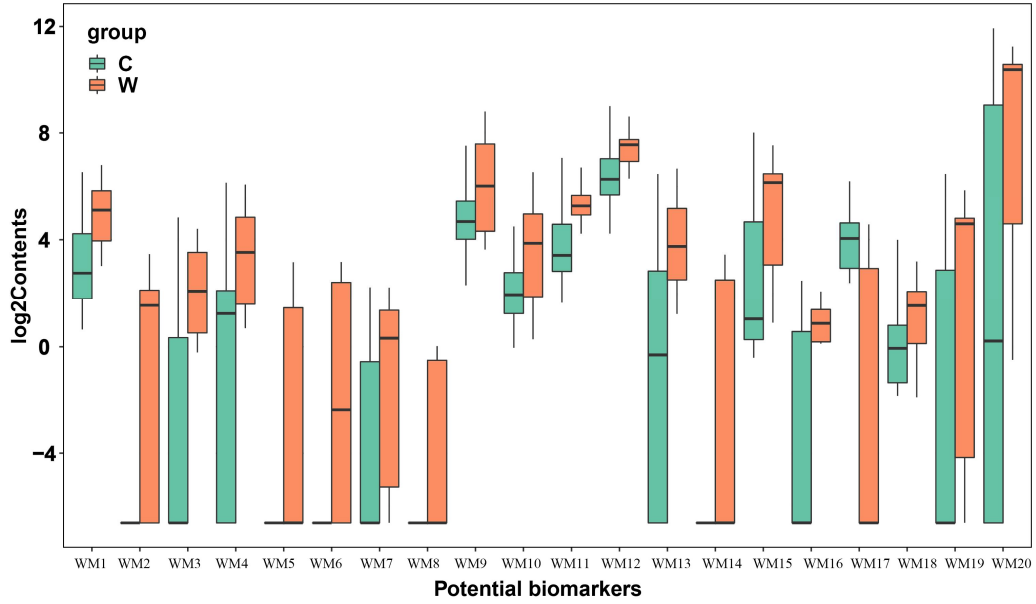

Figure S2: The Contents of potential biomarkers in wild and cultivar germplasms. The contents of volatiles were normalized by log2. The compounds were listed in the Table S3. C: Cultivar germplasms; W: Wild citrus germplasms.
